# Supplementary material for: Systematic drug repositioning through mining adverse event data in ClinicalTrials.gov
Source: PeerJ. 2017 Mar 23;5:e3154. doi: 10.7717/peerj.3154 (PMC5366063; doi:10.7717/peerj.3154)
Supplement: Supplemental Information 2 — With all results with z-score < − 1 [file peerj-05-3154-s002.xlsx]

## Sheet: SAE_Cancer_CTgov20160816ranked
Drug	Serious Adverse Event	Number of patients with SAE in Drug arm	Number of patients in Drug arm	Number of patients with SAE in Control arm	Number of patients in Control arm	Control	SE	OR	LowerLimit	UpperLimit	z score	ClinicalTrials.gov ID
V501	Cervical dysplasia	20	480	46	468	Placebo	0.276193	0.398866	0.232127	0.685373	-3.32785	NCT00378560
Clopidogrel / Telmisartan	Colon cancer	4	5000	14	5023	Clopidogrel / Placebo	0.567299	0.286458	0.094225	0.870874	-2.20371	NCT00153062
Vorapaxar	RECTAL CANCER	4	13186	13	13166	Placebo	0.571905	0.307015	0.100079	0.941836	-2.06478	NCT00526474
Phyloquinone	Cancer	3	217	11	223	Placebo	0.658508	0.270178	0.074322	0.982163	-1.98733	NCT00150969
Clopidogrel + ASA	Pancreatic carcinoma	1	3772	8	3782	Placebo + ASA	1.06091	0.125099	0.015638	1.00074	-1.95931	NCT00249873
Core-phase: Aliskiren	Gastric cancer	1	4272	8	4285	Core-phase: Placebo	1.06088	0.125176	0.015649	1.00129	-1.95878	NCT00549757
Ramipril (ONTARGET)	Renal cancer	0	8576	4	2972	Placebo (TRANSCEND)	1.89309	0.025957	0.000635	1.06093	-1.92876	NCT00153101
Valsartan 160 mg od + Nateglinide 60 mg ac	Bladder cancer	3	2297	10	2316	Placebo	0.658941	0.301569	0.082887	1.09721	-1.81922	NCT00097786
Valsartan 160 mg od + Nateglinide 60 mg ac	Gastric cancer	1	2297	7	2305	Nateglinide 60 mg ac + Placebo Valsartan	1.06945	0.142982	0.017577	1.1631	-1.81872	NCT00097786
Saxagliptin	Pancreatic carcinoma	2	8280	8	8212	Placebo	0.790723	0.247765	0.052597	1.16712	-1.76456	NCT01107886
Telmisartan (ONTARGET)	Myelodysplastic syndrome	0	8542	3	2972	Placebo (TRANSCEND)	1.91497	0.034759	0.000815	1.48294	-1.75424	NCT00153101
Telmisartan (ONTARGET)	Uterine leiomyoma	0	8542	3	2972	Placebo (TRANSCEND)	1.91497	0.034759	0.000815	1.48294	-1.75424	NCT00153101
Clopidogrel / Telmisartan	Pancreatic carcinoma	2	5000	8	5024	Aspirin + Extended Release Dipyridamole / Placebo	0.790822	0.2509	0.053253	1.18212	-1.74843	NCT00153062
Saxagliptin	Squamous cell carcinoma	18	8280	30	8212	Placebo	0.29855	0.59419	0.330975	1.06673	-1.74361	NCT01107886
Bazedoxifene 20 mg	Endometrial carcinoma	0	1886	7	1885	Placebo	1.86474	0.042682	0.001104	1.65023	-1.69138	NCT00205777
Vorapaxar	PROSTATE CANCER	38	13186	54	13166	Placebo	0.212101	0.701777	0.463079	1.06351	-1.66968	NCT00526474
Cinacalcet	Parathyroid tumour benign	1	1938	6	1923	Placebo	1.0806	0.164946	0.019839	1.37142	-1.66771	NCT00345839
Saxagliptin	Transitional cell carcinoma	1	8280	6	8212	Placebo	1.08024	0.165197	0.019883	1.37252	-1.66687	NCT01107886
Fluticasone Furoate 100 µg	Pancreatic carcinoma	1	4157	6	4131	Placebo	1.08035	0.165423	0.019906	1.3747	-1.66543	NCT01313676
Vorapaxar	CHRONIC MYELOID LEUKAEMIA	1	13186	6	13166	Placebo	1.08019	0.166351	0.020024	1.38199	-1.6605	NCT00526474
ROSUVASTATIN 20 MG	Rectal cancer	1	8869	6	8864	PLACEBO	1.08023	0.166479	0.020038	1.38314	-1.65973	NCT00239681
Sitagliptin	Plasma cell myeloma	1	7266	6	7274	Placebo	1.08025	0.166735	0.020068	1.38534	-1.65827	NCT00790205
Ticagrelor 60mg bd	Metastatic gastric cancer	1	6958	6	6996	Placebo	1.08026	0.167457	0.020154	1.39135	-1.65426	NCT01225562
Year 1 - Lorcaserin 10 mg BID	Uterine leiomyoma	0	1593	3	697	Year 2 - Placebo (Yr 1) / Placebo (Yr 2)	1.91539	0.043574	0.00102	1.86055	-1.63585	NCT00395135
Raloxifene 60 mg (Core Study)	Neoplasm	3	1849	9	1885	Placebo	0.667472	0.33875	0.091562	1.25327	-1.62178	NCT00205777
Nintedanib 150mg Bid	Squamous cell carcinoma	1	309	4	204	Placebo	1.12172	0.162338	0.018013	1.463	-1.6208	NCT01335464
Saxagliptin	Rectal cancer	0	8280	6	8212	Placebo	1.87089	0.049555	0.001266	1.93921	-1.60601	NCT01107886
Bapineuzumab	Prostate cancer	1	654	4	439	Placebo	1.11975	0.166539	0.018551	1.49507	-1.60083	NCT00676143
Valsartan 160 mg od + Nateglinide 60 mg ac	Lung neoplasm malignant	8	2297	16	2316	Placebo	0.434018	0.502403	0.214589	1.17624	-1.586	NCT00097786
ROSUVASTATIN 20 MG	Bladder neoplasm	2	8869	7	8864	PLACEBO	0.801924	0.285392	0.059269	1.37421	-1.5636	NCT00239681
ROSUVASTATIN 20 MG	Lung neoplasm	2	8869	7	8864	PLACEBO	0.801924	0.285392	0.059269	1.37421	-1.5636	NCT00239681
Sitagliptin	Squamous cell carcinoma of lung	2	7266	7	7274	Placebo	0.801955	0.285832	0.059357	1.37641	-1.56162	NCT00790205
Tiotropium Bromide Inhalation Capsules 18 mcg	Gastric cancer	2	2986	7	3006	Placebo	0.802201	0.287151	0.059602	1.38343	-1.55541	NCT00144339
Fluticasone Furoate 100 µg	Adenocarcinoma gastric	0	4157	5	4131	Placebo	1.87984	0.059557	0.001495	2.37185	-1.50056	NCT01313676
Ivabradine	Breast cancer	0	9539	5	9544	Placebo	1.87977	0.060002	0.001507	2.38924	-1.49666	NCT02446990
Clopidogrel + ASA	Colon neoplasm	0	3772	5	3782	Placebo + ASA	1.87986	0.060084	0.001509	2.39292	-1.49586	NCT00249873
Ticagrelor 60mg bd	Lung adenocarcinoma	0	6958	5	6996	Placebo	1.87979	0.060287	0.001514	2.40069	-1.49412	NCT01225562
Darbepoetin Alfa	Gastric cancer	0	2004	5	2019	Placebo	1.87998	0.060308	0.001514	2.40243	-1.49378	NCT00093015
Sitagliptin	Squamous cell carcinoma	26	7266	38	7274	Placebo	0.255056	0.683833	0.414803	1.12735	-1.49003	NCT00790205
Vorapaxar	MYELODYSPLASTIC SYNDROME	1	13186	5	13166	Placebo	1.09551	0.199636	0.023319	1.70907	-1.47078	NCT00526474
Sitagliptin	Endometrial adenocarcinoma	1	7266	5	7274	Placebo	1.09557	0.20011	0.023372	1.71332	-1.46854	NCT00790205
Clopidogrel + ASA	Multiple myeloma	1	3772	5	3782	Placebo + ASA	1.09569	0.200318	0.023391	1.71549	-1.46743	NCT00249873
Bazedoxifene 40/ 20 mg	Ovarian cyst	1	1872	5	1885	Placebo	1.09593	0.200962	0.023455	1.72183	-1.46418	NCT00205777
Ticagrelor 90mg bd	Bladder cancer	5	6988	11	6996	Placebo	0.539625	0.454676	0.157893	1.3093	-1.46059	NCT01225562
Ivabradine	Gastric cancer	3	9539	8	9544	Placebo	0.677158	0.375	0.099454	1.41397	-1.44845	NCT02446990
Clopidogrel + ASA	Rectal cancer	3	3772	8	3782	Placebo + ASA	0.677395	0.375497	0.09954	1.4165	-1.44599	NCT00249873
Darbepoetin Alfa	Prostate cancer	3	1133	8	1140	Placebo	0.678308	0.375664	0.099406	1.41967	-1.44339	NCT00358215
Raloxifene 60 mg (Core Study)	Skin carcinoma	14	1849	23	1885	Placebo	0.340571	0.617652	0.316843	1.20405	-1.41477	NCT00205777
Bapineuzumab	Squamous cell carcinoma	0	654	3	439	Placebo	1.91585	0.066697	0.001561	2.85046	-1.41326	NCT00676143
Valsartan 160 mg od + Nateglinide 60 mg ac	Basal cell carcinoma	9	2297	16	2283	Valsartan 160 mg od + Placebo Nateglinide	0.417719	0.557337	0.245781	1.26383	-1.39947	NCT00097786
Sitagliptin	Squamous cell carcinoma of skin	12	7266	20	7274	Placebo	0.365526	0.6	0.293096	1.22827	-1.39751	NCT00790205
ERN + Simvastatin	Non-small cell lung cancer	0	1718	4	1696	Placebo + Simvastatin	1.89328	0.073878	0.001807	3.02069	-1.3761	NCT00120289
Rosuvastatin 10mg	Renal Cell Carcinoma	0	1389	4	1378	Placebo	1.89335	0.074206	0.001815	3.03454	-1.37371	NCT00240331
Randomized Sibutramine	Adrenal adenoma	0	4904	4	4881	Randomized Placebo	1.89308	0.074592	0.001825	3.04867	-1.37117	NCT00234832
Randomized Sibutramine	Bile duct cancer	0	4904	4	4881	Randomized Placebo	1.89308	0.074592	0.001825	3.04867	-1.37117	NCT00234832
Irbesartan	Laryngeal cancer	0	4518	4	4498	Placebo	1.89309	0.074607	0.001825	3.04933	-1.37106	NCT00249795
Denosumab 60 mg Q6M	Metastases to liver	0	3886	4	3876	Placebo	1.89311	0.074736	0.001828	3.05472	-1.37013	NCT00089791
IRBESARTAN	OVARIAN CANCER	0	2064	4	2062	PLACEBO	1.89323	0.074793	0.001829	3.05778	-1.36964	NCT00095238
Vorapaxar	PHAEOCHROMOCYTOMA	0	6446	4	6441	Placebo	1.89305	0.074899	0.001833	3.06107	-1.36902	NCT00527943
Vorapaxar	RENAL CANCER	0	6446	4	6441	Placebo	1.89305	0.074899	0.001833	3.06107	-1.36902	NCT00527943
Spironolactone	LYMPHOMA	0	1722	4	1723	Placebo	1.89328	0.074882	0.001831	3.06175	-1.36897	NCT00094302
Ivabradine	Metastases to peritoneum	0	9539	4	9544	Placebo	1.89302	0.07501	0.001835	3.06546	-1.36825	NCT02446990
Sitagliptin	B-cell lymphoma	0	7266	4	7274	Placebo	1.89304	0.075044	0.001836	3.06696	-1.368	NCT00790205
Sitagliptin	Laryngeal cancer	0	7266	4	7274	Placebo	1.89304	0.075044	0.001836	3.06696	-1.368	NCT00790205
Rivaroxaban 2.5 mg Bid	Bronchial Carcinoma	0	5115	4	5125	Placebo	1.89307	0.075092	0.001837	3.06911	-1.36764	NCT00809965
Aspirin + Extended Release Dipyridamole / Telmisartan	Bladder cancer recurrent	0	5013	4	5023	Clopidogrel / Placebo	1.89308	0.075094	0.001837	3.0692	-1.36762	NCT00153062
Aspirin + Extended Release Dipyridamole / Telmisartan	Lymphoma	0	5013	4	5023	Clopidogrel / Placebo	1.89308	0.075094	0.001837	3.0692	-1.36762	NCT00153062
Aspirin + Extended Release Dipyridamole / Telmisartan	Oesophageal carcinoma	0	5013	4	5023	Clopidogrel / Placebo	1.89308	0.075094	0.001837	3.0692	-1.36762	NCT00153062
Valsartan 160 mg od + Nateglinide 60 mg ac	Metastasis	0	2297	4	2305	Nateglinide 60 mg ac + Placebo Valsartan	1.8932	0.07514	0.001838	3.07183	-1.36721	NCT00097786
Core-phase: Aliskiren	Hepatic neoplasm	0	4272	4	4285	Core-phase: Placebo	1.89309	0.075163	0.001839	3.07213	-1.36712	NCT00549757
Core-phase: Aliskiren	Neoplasm prostate	0	4272	4	4285	Core-phase: Placebo	1.89309	0.075163	0.001839	3.07213	-1.36712	NCT00549757
Fluticasone Furoate 100 µg	Metastases to liver	2	4157	6	4131	Placebo	0.816792	0.330927	0.066752	1.64059	-1.3539	NCT01313676
Irbesartan	Endometrial cancer	2	4518	6	4498	Placebo	0.816768	0.331562	0.066883	1.64366	-1.3516	NCT00249795
Denosumab 60 mg Q6M	Ovarian cyst	2	3886	6	3876	Placebo	0.816812	0.332132	0.066992	1.64663	-1.34942	NCT00089791
Aspirin + Extended Release Dipyridamole / Telmisartan	Lung cancer metastatic	2	5013	6	5023	Clopidogrel / Placebo	0.816741	0.333732	0.067325	1.65433	-1.34365	NCT00153062
Core-phase: Aliskiren	Lung adenocarcinoma	2	4272	6	4285	Core-phase: Placebo	0.816783	0.334036	0.06738	1.65597	-1.34247	NCT00549757
Darbepoetin Alfa	Metastases to liver	2	1133	6	1140	Placebo	0.817577	0.334218	0.067312	1.65945	-1.3405	NCT00358215
Vorapaxar	LUNG CANCER METASTATIC	18	13186	27	13166	Placebo	0.30454	0.665198	0.366203	1.20832	-1.33864	NCT00526474
ERN + Simvastatin	Lung neoplasm malignant	8	1718	14	1696	Placebo + Simvastatin	0.444531	0.562072	0.235179	1.34333	-1.29603	NCT00120289
Sitagliptin 50 mg b.i.d + Metformin 1000 mg b.i.d.	Any Neoplasms Benign, Malignant And Unspecified	1	182	4	176	Placebo/Metformin 1000 mg b.i.d.	1.12309	0.237569	0.02629	2.14677	-1.27977	NCT00103857
Outlook Intervention	neoplasm	1	75	4	74	Attention Control	1.1304	0.236486	0.025798	2.16781	-1.27554	NCT01044290
Ivabradine	Lung cancer metastatic	5	9539	10	9544	Placebo	0.547914	0.5	0.170835	1.4634	-1.26507	NCT02446990
Ticagrelor 90mg bd	Malignant melanoma	5	6988	10	6996	Placebo	0.547984	0.500215	0.170885	1.46423	-1.26412	NCT01225562
High-dose Everolimus Group	Basal cell carcinoma	1	278	4	273	Control Group	1.12131	0.24278	0.026961	2.18619	-1.26246	NCT00251004
ERN + Simvastatin	Malignant melanoma	1	1718	4	1696	Placebo + Simvastatin	1.11856	0.24636	0.027506	2.20651	-1.25247	NCT00120289
Rosuvastatin 10mg	Bladder Cancer	1	1389	4	1378	Placebo	1.11868	0.247478	0.027625	2.21706	-1.24828	NCT00240331
Cinacalcet	Neoplasm	1	1938	4	1923	Placebo	1.1185	0.247677	0.027657	2.21804	-1.24777	NCT00345839
Saxagliptin	Prostate cancer metastatic	1	8280	4	8212	Placebo	1.11814	0.247856	0.027696	2.2181	-1.24752	NCT01107886
Saxagliptin	Small cell lung cancer stage unspecified	1	8280	4	8212	Placebo	1.11814	0.247856	0.027696	2.2181	-1.24752	NCT01107886
Valsartan 160 mg od + Nateglinide 60 mg ac	Bladder transitional cell carcinoma	1	2297	4	2283	Valsartan 160 mg od + Placebo Nateglinide	1.11843	0.248149	0.027713	2.22195	-1.24615	NCT00097786
Valsartan 160 mg od + Nateglinide 60 mg ac	Pancreatic carcinoma metastatic	1	2297	4	2283	Valsartan 160 mg od + Placebo Nateglinide	1.11843	0.248149	0.027713	2.22195	-1.24615	NCT00097786
Fluticasone Furoate 100 µg	Bronchial carcinoma	1	4157	4	4131	Placebo	1.11825	0.248256	0.027735	2.22215	-1.24596	NCT01313676
Irbesartan	Adenocarcinoma	1	4518	4	4498	Placebo	1.11823	0.248727	0.027788	2.22629	-1.24428	NCT00249795
Roflumilast 500 µg	Lung neoplasm malignant	1	968	4	967	Placebo	1.11896	0.248966	0.027775	2.23161	-1.24262	NCT01329029
Rosuvastatin 10mg	Prostate Cancer	3	1389	7	1378	Placebo	0.691116	0.423933	0.109398	1.64281	-1.24173	NCT00240331
Bazedoxifene 20 mg	Lymphoma	1	1886	4	1885	Placebo	1.11851	0.249469	0.027856	2.23414	-1.24131	NCT00205777
Spironolactone	PROSTATE CANCER	1	1722	4	1723	Placebo	1.11855	0.249709	0.027881	2.23649	-1.2404	NCT00094302
Sitagliptin	Cholangiocarcinoma	1	7266	4	7274	Placebo	1.11816	0.250172	0.027954	2.23889	-1.23919	NCT00790205
Sitagliptin	Uterine cancer	1	7266	4	7274	Placebo	1.11816	0.250172	0.027954	2.23889	-1.23919	NCT00790205
Rivaroxaban 2.5 mg Bid	Gastric Cancer	1	5115	4	5125	Placebo	1.11821	0.250342	0.02797	2.24064	-1.23852	NCT00809965
Aspirin + Extended Release Dipyridamole / Telmisartan	Rectal cancer	1	5013	4	5023	Clopidogrel / Placebo	1.11821	0.250349	0.027971	2.24072	-1.23849	NCT00153062
Clopidogrel + ASA	Gallbladder cancer	1	3772	4	3782	Placebo + ASA	1.11827	0.250464	0.02798	2.24201	-1.23802	NCT00249873
Clopidogrel / Telmisartan	Neoplasm malignant	1	5000	4	5023	Clopidogrel / Placebo	1.11821	0.251	0.028044	2.24655	-1.23617	NCT00153062
Ticagrelor 60mg bd	Breast cancer metastatic	1	6958	4	6996	Placebo	1.11816	0.251258	0.028075	2.24863	-1.23531	NCT01225562
Empagliflozin 25 mg	Squamous cell carcinoma of skin	3	2342	7	2333	Placebo	0.690687	0.426189	0.110072	1.65016	-1.23482	NCT01131676
Vorapaxar	OESOPHAGEAL CARCINOMA	3	13186	7	13166	Placebo	0.690176	0.427791	0.110597	1.65471	-1.2303	NCT00526474
Year 1 E+M	Breast cancer	0	274	3	268	Year 1 M+Placebo	1.91679	0.096821	0.002261	4.14551	-1.21812	NCT00195494
Fingolimod 0.5 mg	Breast cancer	0	425	3	418	Placebo	1.9161	0.097716	0.002285	4.17812	-1.21376	NCT00289978
Full Factorial Calcium Plus Vitamin D	Lymphoma/leukemia	0	421	3	415	Full Factorial Placebo	1.91611	0.097932	0.00229	4.18744	-1.2126	NCT00153816
Tiotropium	Prostate cancer	0	260	3	259	Placebo	1.91688	0.098575	0.002302	4.22132	-1.2087	NCT00525512
Creatine	Malignant melanoma	0	874	3	867	Placebo	1.91545	0.09889	0.002316	4.22299	-1.20794	NCT00449865
Creatine	Renal cell carcinoma	0	874	3	867	Placebo	1.91545	0.09889	0.002316	4.22299	-1.20794	NCT00449865
Cladribine 3.5 mg/kg (ITP)	Thyroid neoplasm	0	206	3	206	Placebo (ITP)	1.91741	0.098687	0.002302	4.23051	-1.20778	NCT00725985
Cinacalcet	Rectal cancer	0	1938	3	1923	Placebo	1.91512	0.099087	0.002322	4.22865	-1.20711	NCT00345839
Saxagliptin	Thyroid cancer	0	8280	3	8212	Placebo	1.91492	0.099146	0.002324	4.22947	-1.20692	NCT01107886
Valsartan 160 mg od + Nateglinide 60 mg ac	Parathyroid tumour benign	0	2297	3	2283	Valsartan 160 mg od + Placebo Nateglinide	1.91508	0.099273	0.002326	4.23625	-1.20615	NCT00097786
Year 1 - Lorcaserin 10 mg BID	Breast cancer	0	1593	3	1584	Year 1 - Matching Placebo BID	1.91518	0.099265	0.002326	4.23677	-1.20613	NCT00395135
Fluticasone Furoate 100 µg	Rectal adenocarcinoma	0	4157	3	4131	Placebo	1.91498	0.09931	0.002328	4.23697	-1.20602	NCT01313676
Simvastatin	Bone Neoplasm	1	433	4	452	Placebo	1.12007	0.259259	0.028861	2.32891	-1.20522	NCT01061671
Randomized Sibutramine	Metastatic renal cell carcinoma	0	4904	3	4881	Randomized Placebo	1.91496	0.099476	0.002332	4.2439	-1.20516	NCT00234832
Irbesartan	Neoplasm malignant	0	4518	3	4498	Placebo	1.91497	0.099498	0.002332	4.2449	-1.20504	NCT00249795
Denosumab 60 mg Q6M	Renal cancer	0	3886	3	3876	Placebo	1.91499	0.099673	0.002336	4.25255	-1.20411	NCT00089791
Fluticasone Furoate/Vilanterol 100/25 µg	Bladder transitional cell carcinoma	0	4140	3	4131	Placebo	1.91498	0.099717	0.002337	4.25437	-1.20388	NCT01313676
Vilanterol 25 µg	Non-small cell lung cancer	0	4140	3	4131	Placebo	1.91498	0.099717	0.002337	4.25437	-1.20388	NCT01313676
SMC021	Bladder cancer	0	2334	3	2331	Placebo	1.91508	0.099756	0.002338	4.25682	-1.20362	NCT00525798
Vorapaxar	B-CELL LYMPHOMA	0	13186	3	13166	Placebo	1.91489	0.099828	0.00234	4.25836	-1.20336	NCT00526474
RotaTeq™	Neuroblastoma	0	34904	3	34862	Placebo	1.91487	0.099872	0.002341	4.26003	-1.20315	NCT00090233
Spironolactone	LIVER CANCER	0	1722	3	1723	Placebo	1.91516	0.099901	0.002341	4.2637	-1.20281	NCT00094302
Ivabradine	Bladder cancer recurrent	0	9539	3	9544	Placebo	1.91491	0.100024	0.002345	4.26686	-1.20233	NCT02446990
Ivabradine	Lung squamous cell carcinoma metastatic	0	9539	3	9544	Placebo	1.91491	0.100024	0.002345	4.26686	-1.20233	NCT02446990
Ivabradine	Metastases to lymph nodes	0	9539	3	9544	Placebo	1.91491	0.100024	0.002345	4.26686	-1.20233	NCT02446990
Ivabradine	Metastatic malignant melanoma	0	9539	3	9544	Placebo	1.91491	0.100024	0.002345	4.26686	-1.20233	NCT02446990
Sitagliptin	Chronic myeloid leukaemia	0	7266	3	7274	Placebo	1.91493	0.100073	0.002346	4.26908	-1.20206	NCT00790205
Aspirin + Extended Release Dipyridamole / Telmisartan	Glioblastoma multiforme	0	5013	3	5024	Aspirin + Extended Release Dipyridamole / Placebo	1.91496	0.100166	0.002348	4.2733	-1.20156	NCT00153062
Core-phase: Aliskiren	Gastrointestinal carcinoma	0	4272	3	4285	Core-phase: Placebo	1.91498	0.100241	0.00235	4.27668	-1.20115	NCT00549757
Valsartan 160 mg od + Nateglinide 60 mg ac	Lung cancer metastatic	0	2297	3	2305	Nateglinide 60 mg ac + Placebo Valsartan	1.91508	0.100231	0.002349	4.27712	-1.20114	NCT00097786
Clopidogrel / Telmisartan	Bladder neoplasm	0	5000	3	5023	Clopidogrel / Placebo	1.91496	0.100406	0.002354	4.28357	-1.2003	NCT00153062
Clopidogrel / Telmisartan	Metastatic neoplasm	0	5000	3	5023	Clopidogrel / Placebo	1.91496	0.100406	0.002354	4.28357	-1.2003	NCT00153062
Darbepoetin Alfa	Breast cancer	0	1133	3	1140	Placebo	1.91531	0.10038	0.002351	4.28543	-1.20022	NCT00358215
Ticagrelor 60mg bd	Glioblastoma	0	6958	3	6996	Placebo	1.91493	0.100507	0.002356	4.28764	-1.1998	NCT01225562
Ticagrelor 60mg bd	Malignant neoplasm of unknown primary site	0	6958	3	6996	Placebo	1.91493	0.100507	0.002356	4.28764	-1.1998	NCT01225562
Tiotropium Bromide Inhalation Capsules 18 mcg	Gastric neoplasm	0	2986	3	3006	Placebo	1.91503	0.100579	0.002357	4.29155	-1.19936	NCT00144339
Tiotropium Bromide Inhalation Capsules 18 mcg	Lung adenocarcinoma metastatic	0	2986	3	3006	Placebo	1.91503	0.100579	0.002357	4.29155	-1.19936	NCT00144339
Tiotropium Bromide Inhalation Capsules 18 mcg	Prostate cancer metastatic	0	2986	3	3006	Placebo	1.91503	0.100579	0.002357	4.29155	-1.19936	NCT00144339
Darbepoetin Alfa	Myelodysplastic syndrome	0	2004	3	2019	Placebo	1.91511	0.100614	0.002358	4.29374	-1.19913	NCT00093015
Raltegravir 400 mg b.i.d Plus OBT	Squamous cell carcinoma	2	232	3	118	Placebo Plus OBT	0.919987	0.333333	0.054925	2.02296	-1.19416	NCT00293267
SOF+RBV	Hepatic neoplasm malignant	0	98	3	103	SOF+RBV+Placebo	1.92013	0.102354	0.002375	4.41117	-1.18706	NCT01604850
Tiotropium Bromide Inhalation Capsules 18 mcg	Lung adenocarcinoma	6	2986	11	3006	Placebo	0.508178	0.5482	0.202474	1.48426	-1.18288	NCT00144339
Dronedarone 400mg Bid	Prostate cancer	6	2291	11	2313	Placebo	0.508378	0.549513	0.202879	1.48839	-1.17771	NCT00174785
Saxagliptin	Renal cell carcinoma	4	8280	8	8212	Placebo	0.612571	0.49565	0.149192	1.64667	-1.1458	NCT01107886
Ivabradine	Lung neoplasm malignant	7	9539	12	9544	Placebo	0.475815	0.583333	0.229559	1.48231	-1.13278	NCT02446990
DDDRP	Neoplasia	4	383	8	385	Control Group	0.616677	0.497361	0.148507	1.66571	-1.13258	NCT00262119
Saxagliptin	Bladder cancer recurrent	2	8280	5	8212	Placebo	0.836805	0.396569	0.076916	2.04466	-1.10528	NCT01107886
Saxagliptin	Lung adenocarcinoma	2	8280	5	8212	Placebo	0.836805	0.396569	0.076916	2.04466	-1.10528	NCT01107886
Sitagliptin	Basal cell carcinoma	44	7266	55	7274	Placebo	0.202944	0.799668	0.53723	1.19031	-1.10158	NCT00790205
Core-phase: Aliskiren	Breast cancer	2	4272	5	4285	Core-phase: Placebo	0.83694	0.400937	0.077743	2.06773	-1.09202	NCT00549757
Clopidogrel / Telmisartan	Gastric cancer	2	5000	5	5023	Clopidogrel / Placebo	0.836899	0.401601	0.077877	2.07098	-1.09009	NCT00153062
Clopidogrel / Telmisartan	Metastases to lung	2	5000	5	5023	Clopidogrel / Placebo	0.836899	0.401601	0.077877	2.07098	-1.09009	NCT00153062
Clopidogrel / Telmisartan	Brain neoplasm	2	5000	5	5024	Aspirin + Extended Release Dipyridamole / Placebo	0.836899	0.401681	0.077893	2.0714	-1.08986	NCT00153062
Darbepoetin Alfa	Colon cancer	2	1133	5	1140	Placebo	0.837714	0.401415	0.077717	2.07334	-1.08958	NCT00358215
Raloxifene 60 mg (Core Study)	Gastrointestinal carcinoma	11	1849	17	1885	Placebo	0.388345	0.65762	0.307191	1.4078	-1.07927	NCT00205777
Everolimus + CNI Reduction: 24 Month Heart	Squamous cell carcinoma	0	69	3	96	Control: 12 Month Heart	1.92145	0.135371	0.003133	5.84923	-1.04074	NCT00377962
